# Supplementary material for: Long-term environmental enrichment affects microglial morphology in middle age mice
Source: Aging (Albany NY). 2019 Apr 29;11(8):2388–402. doi: 10.18632/aging.101923 (PMC6519992; doi:10.18632/aging.101923)
Supplement: Supplementary Table [file aging-11-101923-s001.xlsx]

## Sheet: Figure 1
Figure 1a
qRT-PCR	Hypothalamus
Measure	ΔCт (normalized by Hprt1)
Housing	SE
Gene ID	Ccl2	Il1b	Il6	Tnfa	Nfkbia	Ikbkb	Socs3	Aif1	Cx3cr1	H2Ab1	Tmem119	Trem2	Emr1
Mean	9.22746	11.0412	12.269	11.9575	2.70364	4.45989	9.36656	7.30886	3.45666	4.99549	4.47599	2.93216	7.54594
SEM	0.195268	0.242416	0.188631	0.187215	0.105884	0.155669	0.0857281	0.112705	0.104553	0.213365	0.0649899	0.114705	0.1367
n	8
Housing	EE
Gene ID	Ccl2	Il1b	Il6	Tnfa	Nfkbia	Ikbkb	Socs3	Aif1	Cx3cr1	H2Ab1	Tmem119	Trem2	Emr1
Mean	9.81179	11.8876	13.355	12.3435	3.1668	4.73462	9.67972	7.23563	3.31016	5.70739	4.32453	2.85212	7.7803
SEM	0.121215	0.174465	0.395375	0.195164	0.109347	0.0988086	0.0885533	0.0610467	0.0551682	0.16558	0.0677499	0.0949639	0.0805308
n	8
Student's t-test, p-value	0.0234597	0.0132645	0.0265226	0.175369	0.00877287	0.158402	0.0235317	0.576817	0.2356	0.0195598	0.128985	0.59936	0.161776
Significant?	*	*	*	ns	**	ns	*	ns	ns	*	ns	ns	ns
Figure 1b
qRT-PCR	Amygdala
Measure	ΔCт (normalized by Ppia)
Housing	SE
Gene ID	Ccl2	Il1b	Il6	Tnfa	Nfkbia	Ikbkb	Socs3	Aif1	Cx3cr1	H2Ab1	Tmem119	Trem2	Emr1
Mean	13.0218	15.4378	14.2758	15.9644	6.51503	8.09186	12.6348	11.3461	7.85591	10.947	3.78431	5.58752	10.3389
SEM	0.208539	0.14001	0.24909	0.297323	0.100335	0.0431077	0.107367	0.22795	0.319938	0.225763	0.295551	0.139389	0.0475428
n	8
Housing	EE
Gene ID	Ccl2	Il1b	Il6	Tnfa	Nfkbia	Ikbkb	Socs3	Aif1	Cx3cr1	H2Ab1	Tmem119	Trem2	Emr1
Mean	13.5469	15.4955	14.1232	15.9023	6.93237	8.20595	12.5478	11.687	7.92281	11.6857	3.69969	5.66267	10.3622
SEM	0.0937004	0.217749	0.306679	0.247348	0.0575704	0.0600973	0.0574202	0.155091	0.238657	0.238373	0.312542	0.15079	0.110608
n	8
Student's t-test, p-value	0.0375889	0.826888	0.705106	0.874829	0.00285431	0.145229	0.48678	0.236512	0.869286	0.0410553	0.846881	0.719881	0.849411
Significant?	*	ns	ns	ns	**	ns	ns	ns	ns	*	ns	ns	ns^
											^Significantly unequal variances by F-test.
											Welch's t-test	0.850705
											Significant?	ns

## Sheet: Figure 2
Figure 2b								Figure 2c
Glucose tolerance test								EchoMRI
Measure	Blood glucose (mg/dL)							Measure	% body weight composition
								Fat
Housing	SE							Housing	SE	EE
Time	0 min	15 min	30 min	60 min	90 min	120 min		Mean	16.1348	9.31121
Mean	114	322	351	210	146.6	150.4		SEM	1.62842	0.680572
SEM	7.35527	30.95	26.2202	14.089	9.43186	8.37616		n	5	5
n	5
								Student's t-test, p-value	0.0048
Housing	EE							Significant?	**
Time	0 min	15 min	30 min	60 min	90 min	120 min
Mean	116.2	356.2	276.4	160.4	133	130.2		Lean
SEM	12.8895	14.8809	17.7612	21.1958	16.2265	3.6524		Housing	SE	EE
n	5							Mean	78.56	84.2949
								SEM	1.85564	0.52768
Two-way RM ANOVA (Mixed)								n	5	5
	SS	DF	MS	F (DFn, DFd)	P value	Significant?
Interaction	18320.9	5	3664.19	F (5, 40) = 2.66318441709466	P=0.036057791311443	*		Student's t-test, p-value	0.0178
Time	467080	5	93415.9	F (5, 40) = 67.8960752010849	P<0.000000000000001	****		Significant?	*^
Housing	6161.07	1	6161.07	F (1, 8) = 3.35603591498789	P=0.104325109075333	ns
Subjects (matching)	14686.5	8	1835.82	F (8, 40) = 1.33429838162612	P=0.255096862700581	ns		^Significantly unequal variances by F-test.
Residual	55034.7	40	1375.87					Welch's t-test	0.0341
								Significant?	*
Planned comparison: Fisher's LSD, by Housing (SE vs EE)
Time	0 min	15 min	30 min	60 min	90 min	120 min
Fisher's LSD	0.927657	0.162406	0.0032808	0.0450685	0.575233	0.406168
Significant?	ns	ns	**	*	ns	ns
Figure 2d
Body weight
Measure	Body weight (g)
	SE	n = 5	EE	n = 5		Two-way RM ANOVA (Mixed)
Time	Mean	SEM	Mean	SEM		ANOVA table	SS	DF	MS	F (DFn, DFd)	P value	Significant?
0 weeks	23.48	0.633561	23.48	0.962808		Interaction	13.7247	29	0.473264	F (29, 232) = 0.233756973138491	0.99999	ns
1 week	23.76	0.812773	22.82	0.460435		Time	1513.91	29	52.2038	F (29, 232) = 25.7847691781935	<0.000000000000001	****
2 weeks	22.94	1.30943	23.02	1.13225		Housing	33.3333	1	33.3333	F (1, 8) = 0.12702545259804	0.730753	ns
3 weeks	23.24	1.22662	23.2	1.13798		Subjects (matching)	2099.32	8	262.415	F (8, 232) = 129.613059369776	<0.000000000000001	****
4 weeks	24.18	1.2627	23.42	0.933809		Residual	469.707	232	2.0246
5 weeks
6 weeks	24.88	1.04852	24.14	0.986408
7 weeks	25.26	1.24282	24.12	0.676018
8 weeks	25.28	1.1364	24.88	0.715542
9 weeks	26.46	1.2069	25	0.644205
10 weeks	26.32	1.3658	24.96	0.594138
11 weeks	25.98	1.36543	25.74	0.861974
12 weeks	26.22	1.26586	26.2	1.41598
13 weeks	26.78	1.47323	25.96	1.38672
14 weeks	26.58	1.59009	26.04	1.65922
15 weeks	27.3	1.73118	26.32	2.14173
16 weeks	27.46	1.66781	26.96	1.99198
17 weeks
18 weeks	27.96	1.7879	27.18	2.10404
19 weeks	28.18	1.75966	27.54	2.57546
20 weeks	28.38	1.67881	28.18	2.78155
21 weeks	28.66	2.13134	27.76	2.52448
22 weeks	28.28	1.84212	27.6	2.93513
23 weeks	28.78	2.18938	27.9	2.99917
24 weeks	29.08	2.01032	28.24	3.21761
25 weeks	29.64	2.12899	28.2	3.37417
26 weeks	29.86	2.34171	28.92	3.56819
27 weeks	29.66	2.36846	28.82	3.33572
28 weeks	30.42	2.57126	29.32	3.48525
29 weeks	30.36	2.50691	29.76	3.77266
30 weeks
31 weeks	30.36	2.56078	30.06	4.13739
32 weeks	30.4	2.27947	30.4	4.57493
Figure 2e				Figure 2f
Absoulte Food Intake				Relative intake
Measure	g food/mouse/day			g food/ g mouse bodyweight/day
Housing	SE	EE		Housing	SE	EE
Mean	3.37581	4.30949		Mean	0.12206	0.159944
SEM	0.0513455	0.0545655		SEM	0.00119006	0.0032216
n (weeks measured)	24	24		n	24	24
Student's t-test, p-value	1e-15			Student's t-test, p-value	1.6e-14
Significant?	****			Significant?	****^
				^Significantly unequal variances by F-test.
				Welch's t-test	6.35e-12
				Significant?	****

## Sheet: Figure 5
Figure 5a-c
Cell Density
Measure		Iba1+ cells per field (area: 187,025 sq microns)				*Arc cell density is calibrated to tissue area within a given Arc field
Housing	SE	HA				HYP					AMY
Nucleus		CA1	CA3	DG		Arc	DMH	PVN	VMH		CeA	CoA	MeA
Mean		56.381	50.3125	45.9345		59.9809	42.9792	40.5417	40.5		51.0833	38.0417	43.9583
SEM		3.78239	1.28544	3.94072		6.40127	4.29691	3.68155	2.03471		2.49861	1.16145	2.30375
n	4
Housing	EE	HA				HYP					AMY
Nucleus		CA1	CA3	DG		Arc	DMH	PVN	VMH		CeA	CoA	MeA
Mean		53.6	51.9333	47.7286		44.242	34.1616	43.6	42.0833		42.5	41.6333	38.6
SEM		2.97984	1.86085	3.258		4.82364	8.67114	1.47606	1.78068		1.15229	2.79056	0.781025
n	5
log2CD transform
Housing	SE	HA				HYP					AMY
Nucleus		CA1	CA3	DG		Arc	DMH	PVN	VMH		CeA	CoA	MeA
Mean		5.80768	5.65143	5.50535		5.88256	5.40407	5.32344	5.33406		5.6696	5.24744	5.45185
SEM		0.0946557	0.036848	0.125235		0.150366	0.143743	0.131264	0.0757121		0.0706061	0.0449566	0.0781752
n	4
Housing	EE	HA				HYP					AMY
Nucleus		CA1	CA3	DG		Arc	DMH	PVN	VMH		CeA	CoA	MeA
Mean		5.73411	5.69486	5.56225		5.43613	5.39674	5.44294	5.39011		5.40734	5.26936	5.36638
SEM		0.0877263	0.051932	0.104413		0.146733	0.0578452	0.0489744	0.0601775		0.038197	0.0289576	0.0985509
n	5
Figure 5d-f
Proportional Area
Measure		Iba1+ Proportional Area (fraction of total tissue area within a field that is above a threshold level of DAB staining)
Housing	SE	HA				HYP					AMY
Nucleus		CA1	CA3	DG		Arc	DMH	PVN	VMH		CeA	CoA	MeA
Mean		0.100269	0.058546	0.0508455		0.0909575	0.0694907	0.046694	0.0496653		0.0578168	0.0354775	0.0452797
SEM		0.0159835	0.00820405	0.00911613		0.0126993	0.00433252	0.00742791	0.00672086		0.00810777	0.00455179	0.00611003
n	4
Housing	EE	HA				HYP					AMY
Nucleus		CA1	CA3	DG		Arc	DMH	PVN	VMH		CeA	CoA	MeA
Mean		0.131911	0.106122	0.0866494		0.106129	0.106819	0.097997	0.0952322		0.103102	0.0803724	0.087394
SEM		0.0164178	0.0162563	0.014861		0.0206237	0.0117427	0.0198583	0.0080562		0.0113364	0.00965032	0.0108964
n	5
log2PA transform (converted from percent)
Housing	SE	HA				HYP					AMY
Nucleus		CA1	CA3	DG		Arc	DMH	PVN	VMH		CeA	CoA	MeA
Mean		3.27316	2.50162	2.27485		3.14012	2.78841	2.16579	2.27186		2.48602	1.79169	2.13664
SEM		0.222936	0.22128	0.26266		0.211527	0.0899522	0.238132	0.197587		0.212567	0.183512	0.204903
n	4
Housing	EE	HA				HYP					AMY
Nucleus		CA1	CA3	DG		Arc	DMH	PVN	VMH		CeA	CoA	MeA
Mean		3.67722	3.32637	3.02784		3.29841	3.38115	3.16167	3.22978		3.32987	3.08259	2.95961
SEM		0.178255	0.254637	0.253075		0.280142	0.162423	0.315888	0.126814		0.163133	0.180288	0.190953
n	5
Figure 5g-i
Branch Count
Measure		Number of branches per cell (within a field, normalized to the number of cells within that field)
Housing	SE	HA				HYP					AMY
Nucleus		CA1	CA3	DG		Arc	DMH	PVN	VMH		CeA	CoA	MeA
Mean		97.8801	87.0866	93.5774		99.4375	118.117	94.224	118.006		81.6521	105.408	90.4197
SEM		7.07778	3.31677	7.13539		3.67162	7.95494	5.84285	9.16035		3.30569	10.2337	5.31556
n	4
Housing	EE	HA				HYP					AMY
Nucleus		CA1	CA3	DG		Arc	DMH	PVN	VMH		CeA	CoA	MeA
Mean		131.484	123.378	122.872		165.523	132.143	110.347	143.654		141.454	137.85	137.601
SEM		13.0599	10.7266	8.99092		16.9617	9.00362	9.63942	12.419		10.1956	19.5236	10.0978
n	5
log2BC transform
Housing	SE	HA				HYP					AMY
Nucleus		CA1	CA3	DG		Arc	DMH	PVN	VMH		CeA	CoA	MeA
Mean		6.60162	6.44114	6.5358		6.63274	6.874	6.54936	6.86999		6.34791	6.70083	6.49042
SEM		0.10437	0.056282	0.108107		0.0536288	0.0991477	0.0921869	0.10995		0.0579592	0.132841	0.0903503
n	4
Housing	EE	HA				HYP					AMY
Nucleus		CA1	CA3	DG		Arc	DMH	PVN	VMH		CeA	CoA	MeA
Mean		7.01234	6.92458	6.92611		7.34032	7.03266	6.76421	7.14678		7.12897	7.08896	7.04645
SEM		0.135529	0.127895	0.102788		0.14888	0.0978543	0.124622	0.116472		0.105207	0.105088	0.212151
n	5
Figure 5j-l
Summed Branch Length
Measure		Number of branches per cell (within a field, normalized to the number of cells within that field)
Housing	SE	HA				HYP					AMY
Nucleus		CA1	CA3	DG		Arc	DMH	PVN	VMH		CeA	CoA	MeA
Mean		261.299	236.962	235.264		225.21	281.275	223.584	262.995		205.074	244.602	212.536
SEM		25.7039	16.775	13.594		7.88916	22.2129	13.3577	22.0205		16.2721	15.95	17.6089
n	4
Housing	EE	HA				HYP					AMY
Nucleus		CA1	CA3	DG		Arc	DMH	PVN	VMH		CeA	CoA	MeA
Mean		380.934	368.048	339.396		398.526	369.737	320.853	373.267		424.515	379.687	387.293
SEM		42.319	40.5388	35.4264		31.3009	31.1687	31.9177	30.8974		38.3222	59.0189	35.6908
n	5
log2SL transform
Housing	SE	HA				HYP					AMY
Nucleus		CA1	CA3	DG		Arc	DMH	PVN	VMH		CeA	CoA	MeA
Mean		8.0085	7.87746	7.87028		7.81245	8.12147	7.7964	8.02428		7.66692	7.92522	7.71565
SEM		0.142456	0.103513	0.0887158		0.050784	0.119447	0.0907274	0.117484		0.111062	0.0931048	0.12591
n	4
Housing	EE	HA				HYP					AMY
Nucleus		CA1	CA3	DG		Arc	DMH	PVN	VMH		CeA	CoA	MeA
Mean		8.53998	8.48698	8.37596		8.62186	8.50703	8.29585	8.52439		8.70451	8.57018	8.48791
SEM		0.152999	0.165302	0.14884		0.107843	0.134063	0.148854	0.119144		0.136968	0.143438	0.251608
n	5

## Sheet: Figure 5 cont.
Cell Density
HA								HYP								AMY
Two-way RM ANOVA (Mixed)								Two-way RM ANOVA (Mixed)								Two-way RM ANOVA (Mixed)
	SS	DF	MS	F (DFn, DFd)	P value	Significant?			SS	DF	MS	F (DFn, DFd)	P value	Significant?			SS	DF	MS	F (DFn, DFd)	P value	Significant?
Interaction	0.0228874	2	0.0114437	F (2, 14) = 0.876959223559861	P=0.437699549055259	ns		Interaction	0.43872	3	0.14624	F (3, 21) = 3.9286836586011	P=0.022646901771611	*		Interaction	0.091521	2	0.0457605	F (2, 14) = 5.49720154643739	P=0.017298038639806	*
Nucleus	0.252408	2	0.126204	F (2, 14) = 9.67130922592638	P=0.002300903108376	**		Nucleus	0.51974	3	0.173247	F (3, 21) = 4.65420939957788	P=0.012032205472044	*		Nucleus	0.349295	2	0.174648	F (2, 14) = 20.9804026037684	P=0.000061335027726	****
Housing	0.000530185	1	0.000530185	F (1, 7) = 0.00668429745672015	P=0.937128117886959	ns		Housing	0.0430016	1	0.0430016	F (1, 7) = 0.476999172917264	P=0.512028312293811	ns		Housing	0.0786292	1	0.0786292	F (1, 7) = 1.95826019034892	P=0.204419374465577	ns
Subjects (matching)	0.555225	7	0.0793179	F (7, 14) = 6.07832773693741	P=0.002099922467428	**		Subjects (matching)	0.631052	7	0.0901503	F (7, 21) = 2.42185433620146	P=0.055084464936761	†		Subjects (matching)	0.281068	7	0.0401526	F (7, 14) = 4.82352790430024	P=0.006015609445868	**
Residual	0.18269	14	0.0130493					Residual	0.781697	21	0.0372237					Residual	0.116541	14	0.00832432
								Post-hoc comparison: Fisher's LSD, by Housing (SE vs EE)								Post-hoc comparison: Fisher's LSD, by Housing (SE vs EE)
								Nucleus	Arc	DMH	PVN	VMH				Nucleus	CeA	CoA	MeA
								Fisher's LSD	0.00615849	0.961553	0.434417	0.712724				Fisher's LSD	0.00977922	0.814552	0.365008
								Significant?	**	ns	ns	ns				Significant?	**	ns	ns
Proportional Area
HA								HYP								AMY
Two-way RM ANOVA (Mixed)								Two-way RM ANOVA (Mixed)								Two-way RM ANOVA (Mixed)
	SS	DF	MS	F (DFn, DFd)	P value	Significant?			SS	DF	MS	F (DFn, DFd)	P value	Significant?			SS	DF	MS	F (DFn, DFd)	P value	Significant?
Interaction	0.225097	2	0.112549	F (2, 14) = 3.03822641104447	P=0.080183936176809	ns		Interaction	1.015	3	0.338335	F (3, 21) = 3.84970092035231	P=0.024311970407904	*		Interaction	0.310554	2	0.155277	F (2, 14) = 11.9414215827728	P=0.000941452228076	***
Nucleus	3.14856	2	1.57428	F (2, 14) = 42.4972961363407	P=0.000001131399418	****		Nucleus	1.87231	3	0.624103	F (3, 21) = 7.1012866393839	P=0.001790704712218	**		Nucleus	1.07687	2	0.538433	F (2, 14) = 41.4076764627681	P=0.000001322167931	****
Housing	2.90927	1	2.90927	F (1, 7) = 4.32697869409836	P=0.076069513513287	ns		Housing	4.06449	1	4.06449	F (1, 7) = 6.53762606795637	P=0.037723038058954	*		Housing	6.48006	1	6.48006	F (1, 7) = 14.2656844894925	P=0.006919391131291	**
Subjects (matching)	4.70649	7	0.672356	F (7, 14) = 18.1500946201437	P=0.000005117700158	****		Subjects (matching)	4.35195	7	0.621707	F (7, 21) = 7.07401847120994	P=0.000213634256049	***		Subjects (matching)	3.17969	7	0.454241	F (7, 14) = 34.9330152916491	P=0.000000081839736	****
Residual	0.518619	14	0.0370442					Residual	1.8456	21	0.0878859					Residual	0.182045	14	0.0130032
Post-hoc comparison: Fisher's LSD, by Housing (SE vs EE)								Post-hoc comparison: Fisher's LSD, by Housing (SE vs EE)								Post-hoc comparison: Fisher's LSD, by Housing (SE vs EE)
Nucleus	CA1	CA3	DG					Nucleus	Arc	DMH	PVN	VMH				Nucleus	CeA	CoA	MeA
Fisher's LSD	0.240651	0.0224175	0.0352729					Fisher's LSD	0.619905	0.0708111	0.00381003	0.00514777				Fisher's LSD	0.00489901	9.40637e-05	0.00586127
Significant?	ns	*	*					Significant?	ns	ns	**	**				Significant?	**	****	**
Branch Count
HA								HYP								AMY
Two-way RM ANOVA (Mixed)								Two-way RM ANOVA (Mixed)								Two-way RM ANOVA (Mixed)
	SS	DF	MS	F (DFn, DFd)	P value	Significant?			SS	DF	MS	F (DFn, DFd)	P value	Significant?			SS	DF	MS	F (DFn, DFd)	P value	Significant?
Interaction	0.0106503	2	0.00532513	F (2, 14) = 0.284737016479893	P=0.756465513000259	ns		Interaction	0.417006	3	0.139002	F (3, 21) = 4.45508312030325	P=0.014264469994919	*		Interaction	0.172753	2	0.0863763	F (2, 14) = 3.1590102354866	P=0.073743966736023	ns
Nucleus	0.0696257	2	0.0348128	F (2, 14) = 1.86145776881225	P=0.191933187310095	ns		Nucleus	0.722009	3	0.24067	F (3, 21) = 7.71357827200782	P=0.001165737485364	**		Nucleus	0.122578	2	0.061289	F (2, 14) = 2.24149991959191	P=0.143050385204752	ns
Housing	1.22212	1	1.22212	F (1, 7) = 8.97709635225742	P=0.020050186912882	*		Housing	1.02434	1	1.02434	F (1, 7) = 7.46099870826113	P=0.029275929196086	*		Housing	2.20472	1	2.20472	F (1, 7) = 11.7841978266642	P=0.010943370228551	*
Subjects (matching)	0.952962	7	0.136137	F (7, 14) = 7.27932838822749	P=0.000868411394018	***		Subjects (matching)	0.961047	7	0.137292	F (7, 21) = 4.40028628884819	P=0.003802938016579	**		Subjects (matching)	1.30964	7	0.187091	F (7, 14) = 6.84241596673815	P=0.001182750281738	**
Residual	0.261827	14	0.0187019					Residual	0.655216	21	0.0312008					Residual	0.3828	14	0.0273428
Post-hoc comparison: Fisher's LSD, by Housing (SE vs EE)								Post-hoc comparison: Fisher's LSD, by Housing (SE vs EE)								Post-hoc comparison: Fisher's LSD, by Housing (SE vs EE)
Nucleus	CA1	CA3	DG					Nucleus	Arc	DMH	PVN	VMH				Nucleus	CeA	CoA	MeA
Fisher's LSD	0.0188197	0.00687879	0.02472					Fisher's LSD	0.000146458	0.333332	0.193263	0.0969551				Fisher's LSD	0.00050989	0.0543294	0.0081906
Significant?	*	**	*					Significant?	***	ns	ns	ns				Significant?	***	†	**
Summed Branch Length
HA								HYP								AMY
Two-way RM ANOVA (Mixed)								Two-way RM ANOVA (Mixed)								Two-way RM ANOVA (Mixed)
	SS	DF	MS	F (DFn, DFd)	P value	Significant?			SS	DF	MS	F (DFn, DFd)	P value	Significant?			SS	DF	MS	F (DFn, DFd)	P value	Significant?
Interaction	0.012989	2	0.0064945	F (2, 14) = 0.495126369233579	P=0.619774299799754	ns		Interaction	0.220819	3	0.0736065	F (3, 21) = 2.24022496867892	P=0.113389155513572	ns		Interaction	0.178342	2	0.0891708	F (2, 14) = 3.64103852823726	P=0.053308709658844	†
Nucleus	0.103104	2	0.0515519	F (2, 14) = 3.93019924807744	P=0.044186512786518	*		Nucleus	0.372256	3	0.124085	F (3, 21) = 3.77655433517932	P=0.025972787095715	*		Nucleus	0.0953486	2	0.0476743	F (2, 14) = 1.94664759729401	P=0.179499797265507	ns
Housing	2.00856	1	2.00856	F (1, 7) = 8.07738343963759	P=0.02497030521717	*		Housing	2.67554	1	2.67554	F (1, 7) = 17.0931093630535	P=0.004379876031834	**		Housing	4.46381	1	4.46381	F (1, 7) = 14.5182303387174	P=0.006625496899387	**
Subjects (matching)	1.74065	7	0.248665	F (7, 14) = 18.9576491489885	P=0.0000039226409	****		Subjects (matching)	1.09569	7	0.156527	F (7, 21) = 4.76393377892994	P=0.002457802349813	**		Subjects (matching)	2.15224	7	0.307462	F (7, 14) = 12.5543592268071	P=0.000045471827472	****
Residual	0.183636	14	0.0131169					Residual	0.689991	21	0.0328567					Residual	0.342867	14	0.0244905
Post-hoc comparison: Fisher's LSD, by Housing (SE vs EE)								Post-hoc comparison: Fisher's LSD, by Housing (SE vs EE)								Post-hoc comparison: Fisher's LSD, by Housing (SE vs EE)
Nucleus	CA1	CA3	DG					Nucleus	Arc	DMH	PVN	VMH				Nucleus	CeA	CoA	MeA
Fisher's LSD	0.0160929	0.00679704	0.0212193					Fisher's LSD	5.08976e-05	0.0306948	0.00638294	0.00632076				Fisher's LSD	0.000202669	0.0109901	0.00310668
Significant?	*	**	*					Significant?	****	*	**	**				Significant?	***	*	**
